# Supplementary material
Source: publisher figshare collection journal article supplement (https://acs.figshare.com/ndownloader/files/14210630)
Supplement: Supplementary file 1 [file 14210630]

Supporting information for

## **Versatile and Validated Optical Authentication System based on Physical Unclonable Functions**

Riikka Arppe-Tabbara,\* Mohammad Tabbara and Thomas Just Sørensen\*

Nano-Science Center and Department of Chemistry, University of Copenhagen, Universitetsparken 5, 2100 København Ø, Denmark.

### **Corresponding Author**

\* Thomas Just Sørensen: [TJS@chem.ku.dk](mailto:TJS@chem.ku.dk)

\* Riikka Arppe-Tabbara: [riikka@chem.ku.dk](mailto:riikka@chem.ku.dk)

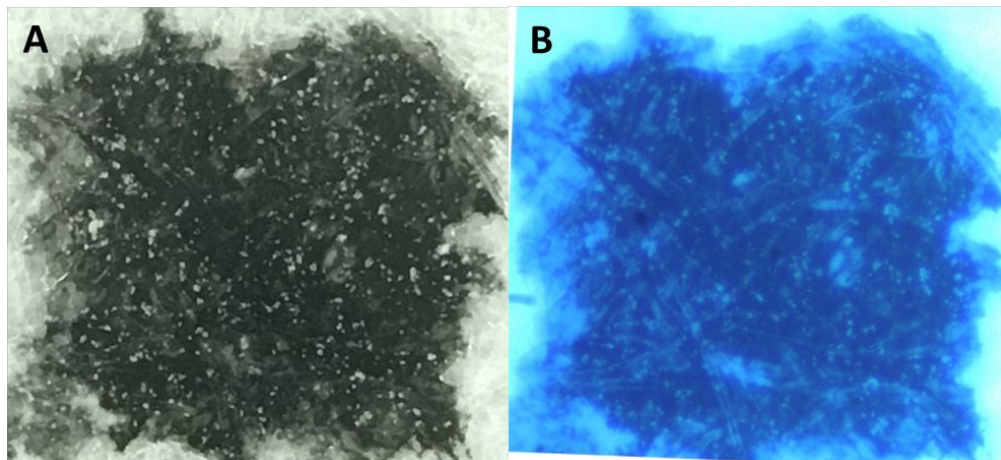

**Figure S1.** Luminescent PUF-tag sprayed onto a QR code printed on Lyreco multi-purpose white labels:  $\text{Y}_3(\text{Al,Ga})_5\text{O}_{12}:\text{Tb}^{3+}$  phosphor. A) Image of the scattering of QMPK65/F-C1 ( $\text{Y}_3(\text{Al,Ga})_5\text{O}_{12}:\text{Tb}$ , 1.5-6.5  $\mu\text{m}$  particle size, Phosphor Technology) taken with iPhone 7 equipped with Nurugo Micro Microscope, B) fluorescence image of the terbium luminescence taken with an Olympus IX71 microscope and 330-385 nm bandpass excitation and 420 nm longpass emission filters (filter cube U-MWU2, Olympus). The black printed square in the picture is about  $0.5 \times 0.5$  mm in dimensions.

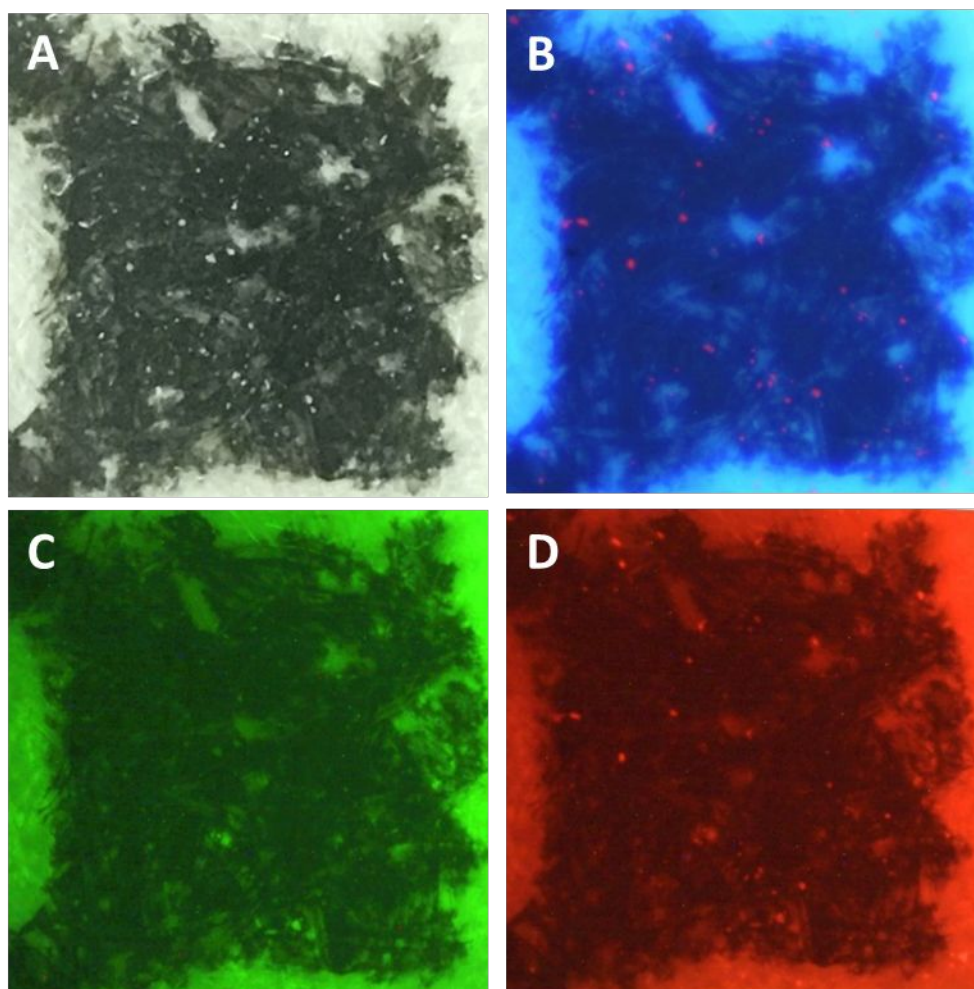

**Figure S2.** Luminescent PUF-tag sprayed onto a QR code printed on Lyreco multi-purpose white labels: mixture of  $(\text{Gd,Lu})_2\text{O}_2\text{S}:\text{Eu}^{3+}$  and  $\text{Gd}_2\text{O}_2\text{S}:\text{Tb}^{3+}$  phosphors. A) Image of the scattering of a mixture of U5KL63 ( $(\text{Gd,Lu})_2\text{O}_2\text{S}:\text{Eu}^{3+}$ , 2.3—12.6  $\mu\text{m}$  particle size) and UKL65/F-R1 ( $\text{Gd}_2\text{O}_2\text{S}:\text{Tb}^{3+}$ , 1.9—6.8  $\mu\text{m}$  particle size, Phosphor Technology) phosphors taken with iPhone 7 equipped with Nurugo Micro Microscope, B-D) fluorescence image of the europium and terbium luminescence taken with an Olympus IX71 microscope and B) 330-385 nm bandpass excitation and 420 nm longpass emission filters (filter cube U-MWU2, Olympus), C) 470-495 nm bandpass excitation and 510-550 nm bandpass emission filters (filter cube U-MNIBA3, Olympus) and D) 510-550 nm bandpass excitation and 590 nm longpass emission filters (filter cube U-MWG2, Olympus). The black printed square in the picture is about  $0.5 \times 0.5$  mm in dimensions.

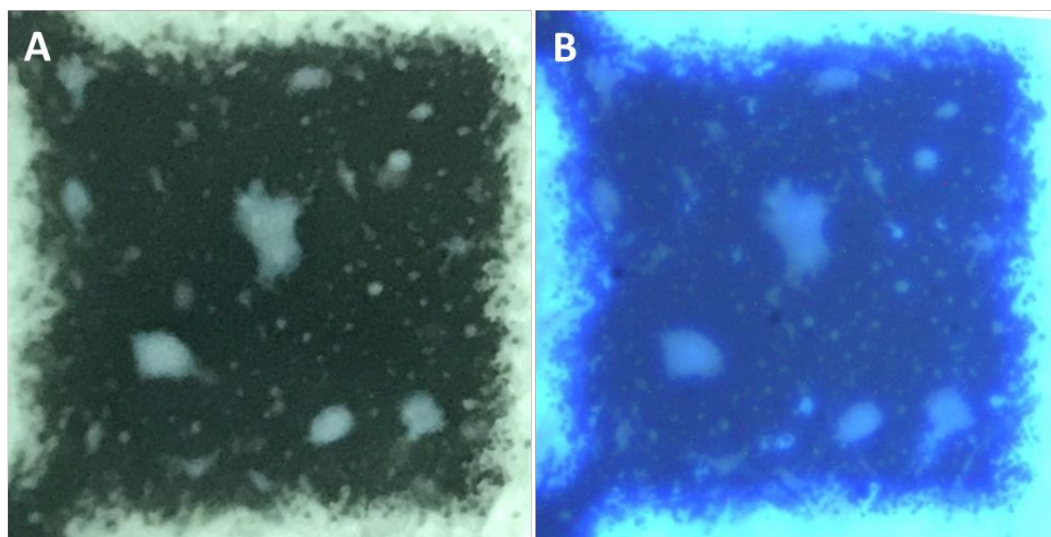

**Figure S3.** Luminescent PUF-tag sprayed onto a QR code printed on Lyreco multi-purpose white labels: mixture of  $\text{TbCl}_3$  and  $\text{ZnO}$ . A) Image of the scattering of a mixture of  $\text{TbCl}_3$  and  $\text{ZnO}$  taken with iPhone 7 equipped with Nurugo Micro Microscope, B) fluorescence image of the terbium luminescence taken with with an Olympus IX71 microscope and 330-385 nm bandpass excitation and 420 nm longpass emission filters (filter cube U-MWU2, Olympus). The black printed square in the picture is about  $0.5 \times 0.5$  mm in dimensions.

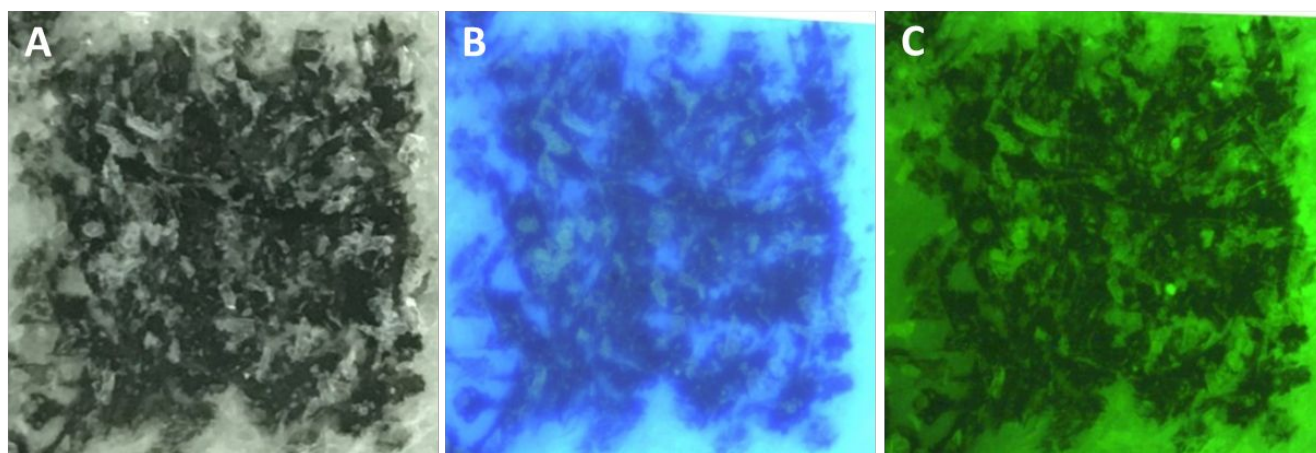

**Figure S4.** Luminescent PUF-tag sprayed onto a QR code printed on Lyreco multi-purpose white labels:  $\text{Tb-acac}$ . A) Image of the scattering of  $\text{Tb-acac}$  taken with iPhone 7 equipped with Nurugo Micro Microscope, B-C) fluorescence image of the terbium luminescence taken with with an Olympus IX71 microscope and B) 330-385 nm bandpass excitation and 420 nm longpass emission filters (filter cube U-MWU2, Olympus), and C) 470-495 nm bandpass excitation and 510-550 nm bandpass emission filters (filter cube U-MNIBA3, Olympus). The black printed square in the picture is about  $0.5 \times 0.5$  mm in dimensions.

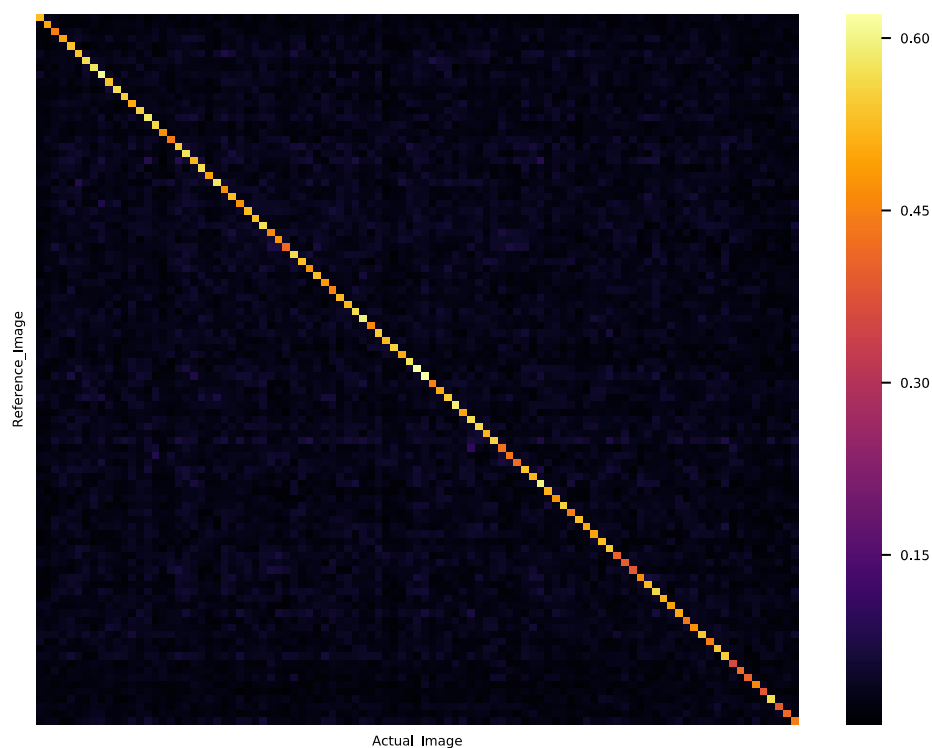

**Figure S5.** Match scores of 100 PUF-tags (Reference\_Image) ran against reimaged pictures (Actual\_image) of the same tags. The color bar shows the match scores. The PUF-tags were manufactured using spray coating on QR codes printed either by a laser printer or four different inkjet printers, and the microparticles included  $\text{TiO}_2$ ,  $\text{ZnO}$ ,  $\text{K}_2\text{WO}_4\text{:Eu}$ ,  $\text{Y}_3(\text{Al,Ga})_5\text{O}_{12}\text{:Tb}$ ,  $(\text{Gd,Lu})_2\text{O}_3\text{:Eu}$  +  $\text{Gd}_2\text{O}_3\text{:Tb}$  -mixture,  $\text{TbCl}_3$  +  $\text{ZnO}$  -mixture, and  $\text{Tb-acac}$ . All three corners of a QR code were used as PUF-tags, giving three replicas of each microparticle – printer -combination.

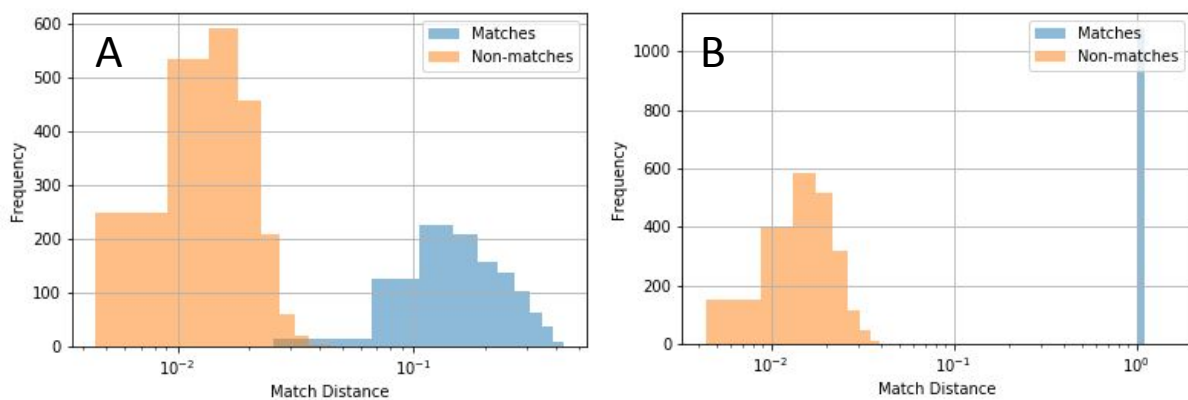

**Figure S6.** The separation between true (blue) and false (orange) matches on an arbitrary match score axis for validation of PUF-tag images matched against A) the reimaged pictures or B) matched against themselves.
